# Supplementary material for: TiO2–LiF composite coating for improving NCM622 cathode cycling stability: one-step construction
Source: Royal Society of Chemistry journal article supplement (doi:10.1039/d3ra05659g), 2023-01-01
Supplement: d3ra05659g1.pdf [file d3ra05659g1.pdf]

## Supporting Information

### TiO<sub>2</sub>-LiF Composite Coating for Improving NCM622 Cathode

#### Cycling Stability: One-Step Construction

Kai Huang,<sup>a</sup> Jinxia Zhou,<sup>a</sup> Huili Yang,<sup>a</sup> Tianzheng Xie,<sup>a</sup> Tu Lan,<sup>a</sup> Suichang Ong,<sup>ab</sup> Heng Jiang,<sup>a</sup> Yibo Zeng,<sup>a</sup> Hang Guo,<sup>\*a</sup> and Ying Zhang,<sup>\*bc</sup>

<sup>a</sup> Pen-Tung Sah Institute of Micro-Nano Science and Technology, Xiamen University, Xiamen, Fujian 361005, People's Republic of China

<sup>b</sup> College of Chemistry and Chemical Engineering, Xiamen University, Xiamen, Fujian 361005, People's Republic of China

<sup>c</sup> Xiamen University Malaysia, 43900, Sepang, Selangor Daryl Ehsan, Malaysia

E-mail: hangguo@xmu.edu.cn and yzhang@xmu.edu.my

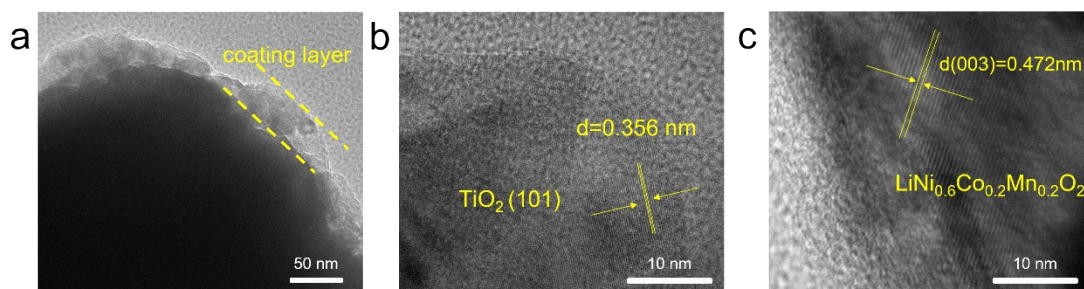

Figure S1. (a-c) HRTEM images of NCM622/TF-0.2%.
